# Supplementary material for: Designed biomolecule–cellulose complexes for palladium recovery and detoxification
Source: Royal Society of Chemistry journal article supplement (doi:10.1039/c4ra16200e), 2015-01-01
Supplement: c4ra16200e1.pdf [file c4ra16200e1.pdf]

## Supplementary Information

# Highly Selective Biomolecule-Cellulose Complexes for Rapid Palladium-Polluted Water Remediation

*Ian Sofian Yunus<sup>a</sup> and Shen-Long Tsai<sup>a\*</sup>*

† Department of Chemical Engineering, National Taiwan University of Science and Technology, Taipei, Taiwan (R.O.C)

\* Address correspondence to Shen-Long Tsai: Department of Chemical Engineering, National Taiwan University of Science and Technology, Taipei, Taiwan (R.O.C). E-mail: stsai@mail.ntust.edu.tw

**Table S1.** List of primers

| Primer     | Sequence                                |
|------------|-----------------------------------------|
| F-XbaI-CBD | 5'GCCCTCTAGAAATAATTTTGTTTAACTTTAAGAAG3' |
| R-NdeI-CBD | 5'GCGCCATATGGCTGCCGCCGC3'               |
| F-NdeI-CBD | 5'GCGCCATATGGCAAATACACCGGTATCAGG3'      |
| R-XhoI-CBD | 5'GCGCCTCGAGTTATGCACCCGGTTCAAGA3'       |

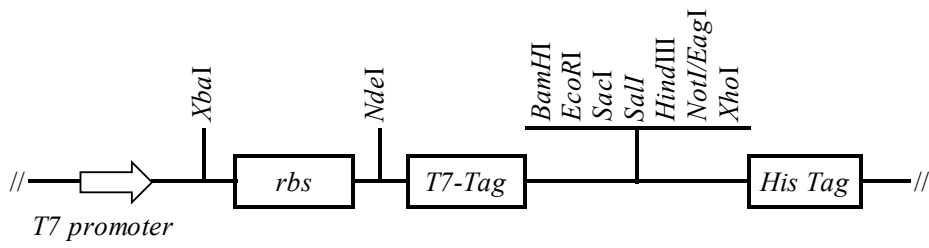

**pET-24a-d(+)**

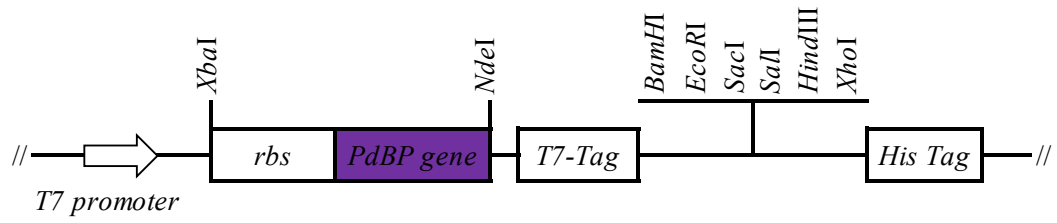

**pPdBP**

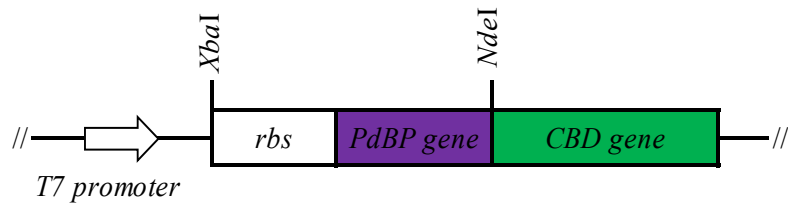

**pPdBP-CBD**

**Figure S1. Plasmid Construction**

$[\text{Pd}^{2+}]_{\text{TOT}} = 0.47 \text{ mM}$

$I = 0.001 \text{ M}$

$\text{pH} = 3.08$

$t = 25^\circ\text{C}$

$[\text{NH}_3]_{\text{TOT}} = 1.88 \text{ mM}$

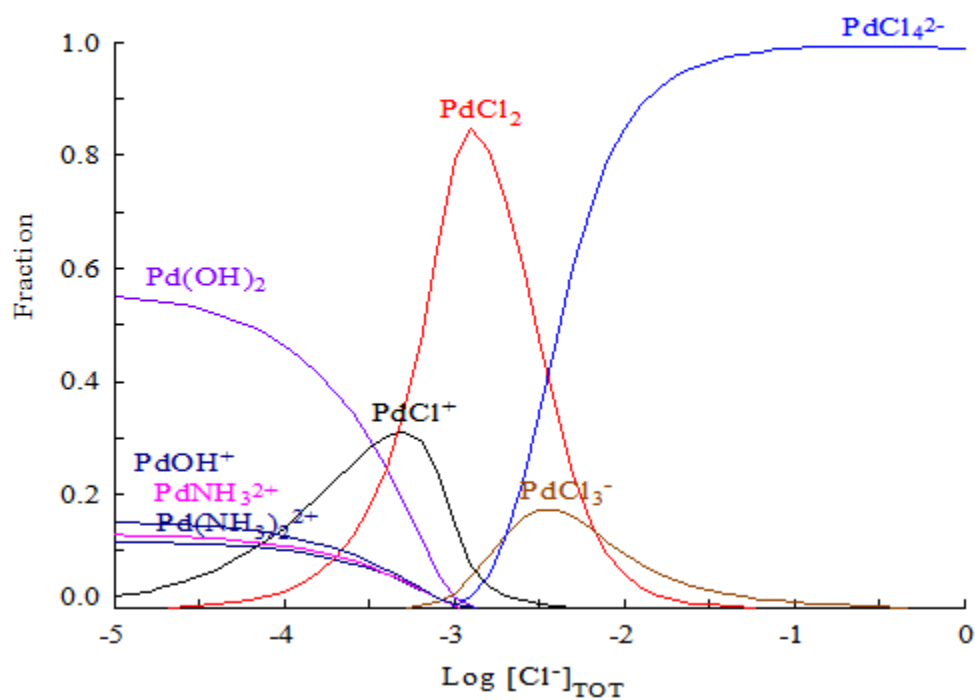

**Figure S2.** Speciation of Pd(II) as a function of chloride concentration ( $\text{pH}=3.08$ , 50 ppm Pd(II),  $25^\circ\text{C}$ )

$[\text{Pd}^{2+}]_{\text{TOT}} = 0.47 \text{ mM}$                        $I = 0.001 \text{ M}$   
 $[\text{Cl}^-]_{\text{TOT}} = 10.00 \text{ mM}$                        $t = 25^\circ\text{C}$                        $[\text{NH}_3]_{\text{TOT}} = 1.88 \text{ mM}$

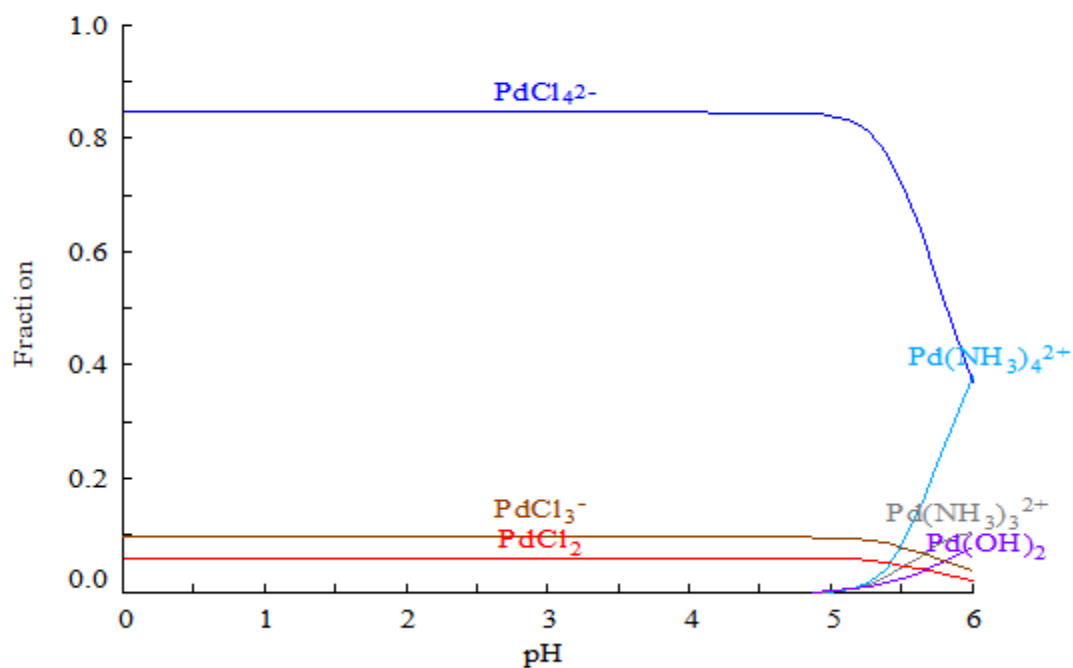

**Figure S3.** Speciation of Pd(II) as a function of pH (50 ppm Pd(II), 25 °C, 10.00 mM  $[\text{Cl}^-]_{\text{TOT}}$ )

$[\text{Pd}^{2+}]_{\text{TOT}} = 0.47 \text{ mM}$

$I = 0.001 \text{ M}$

$[\text{Cl}^-]_{\text{TOT}} = 0.94 \text{ mM}$

$t = 25^\circ\text{C}$

$[\text{NH}_3]_{\text{TOT}} = 1.88 \text{ mM}$

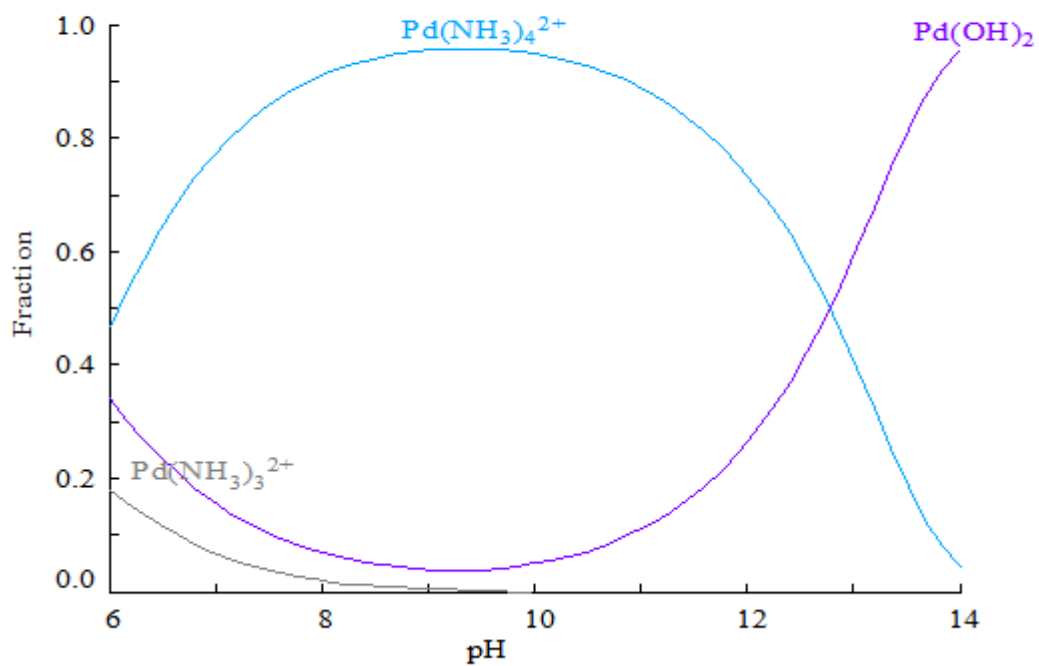

**Figure S4.** Speciation of Pd(II) as a function of pH (50 ppm Pd(II), 25 °C, 0.94 mM  $[\text{Cl}^-]_{\text{TOT}}$ )

**pH Test of Pd-CBD Binding to Microcrystalline Cellulose.** To determine the working condition of fusion protein, pH binding test was taken. A sequence of test tubes containing 1000  $\mu$ L fusion protein (1.73 mg/mL) was prepared. pH was adjusted with HCl and NaOH. To remove denatured protein, after the pH was adjusted, all samples were centrifuged at 15,000 rpm for 7 min. 20  $\mu$ L supernatant of each tube was taken as “before binding” sample for SDS-PAGE. 450  $\mu$ L of remaining supernatant was transferred into a fresh tube. To each fresh tube, 100 mg of the prewashed-avicel was added and mixed for 30 min at room temperature. The suspension was centrifuged at 15,000 rpm for 7 min. 20  $\mu$ L supernatant of each tube was taken as “after binding” sample for SDS-PAGE.

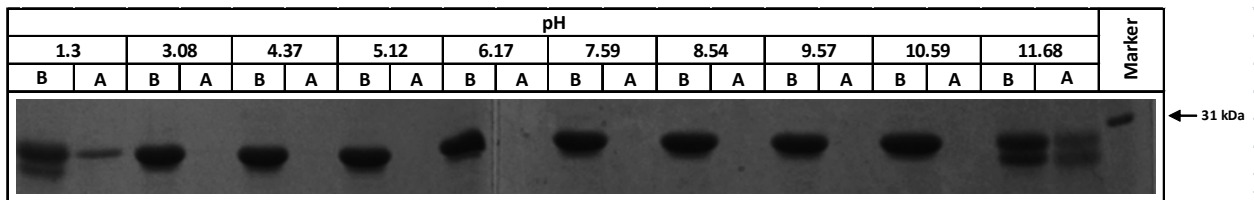

**Figure S5.** pH Test of Pd-CBD Binding to Microcrystalline Cellulose (A: before binding test, B: after binding test)
